# Supplementary material
Source: MDPI journal article supplement (https://www.mdpi.com/2073-4344/8/5/203)
Supplement: s1 [file s1]

# Supplementary Materials: Ru-Pd bimetallic catalysts supported on CeO<sub>2</sub>-MnO<sub>x</sub> oxides as efficient systems for H<sub>2</sub> purification through CO preferential oxidation

Roberto Fiorenza<sup>1</sup>, Luca Spitaleri<sup>1</sup>, Antonino Gulino<sup>1,2</sup> and Salvatore Scir <sup>1,\*</sup>

## 2.2. Catalysts Characterization

### 2.2.1. Temperature Programmed Reduction (H<sub>2</sub>-TPR)

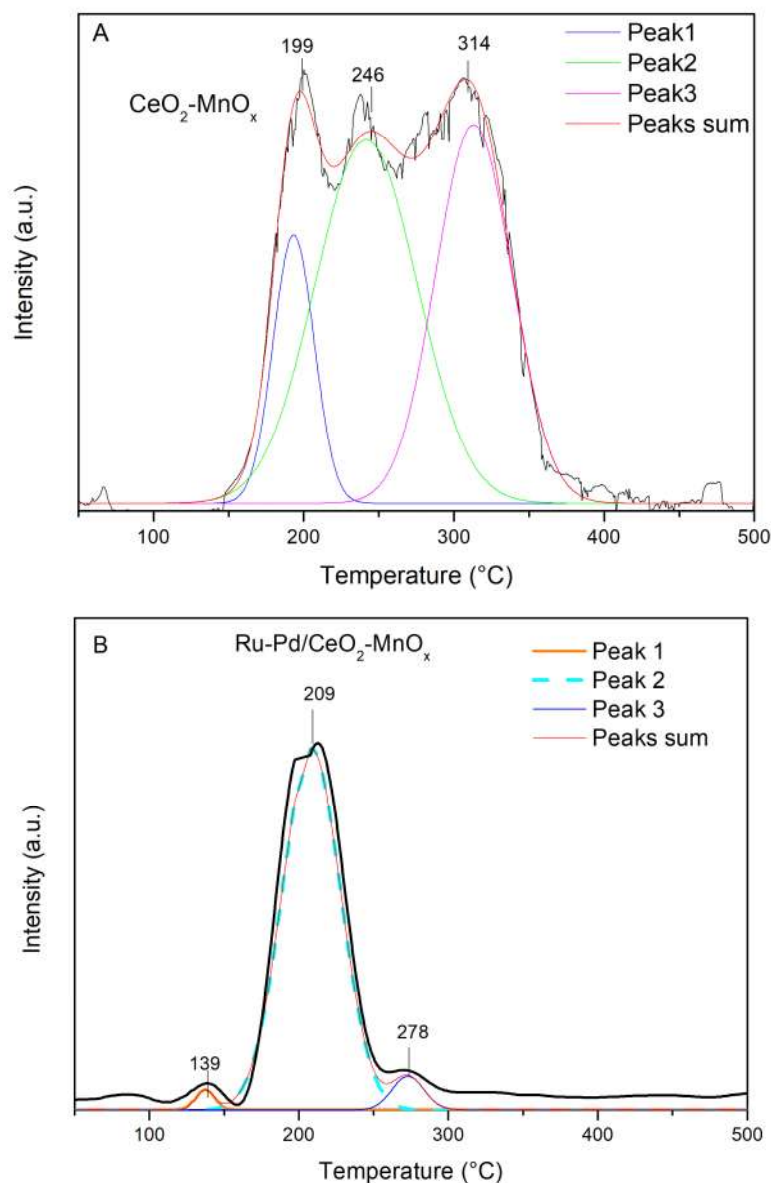

**Figure S1.** H<sub>2</sub>-TPR profiles with peaks deconvolution for Ru/CeO<sub>2</sub>-MnO<sub>x</sub> (A) and Ru-Pd/CeO<sub>2</sub>-MnO<sub>x</sub> (B) samples.

Table S1. H<sub>2</sub>-TPR quantification for the investigated catalysts

| Catalysts                                | LT peak (°C) | H <sub>2</sub> uptake (μmol/g <sub>cat</sub> ) | MT peak (°C) | H <sub>2</sub> uptake (μmol/g <sub>cat</sub> ) | HT peak (°C) | H <sub>2</sub> uptake (μmol/g <sub>cat</sub> ) |
|------------------------------------------|--------------|------------------------------------------------|--------------|------------------------------------------------|--------------|------------------------------------------------|
| CeO <sub>2</sub>                         | -            | -                                              | -            | -                                              | 500          | 161                                            |
| Ru/CeO <sub>2</sub>                      | 164          | 396                                            | 190          | 544                                            | 325          | 210                                            |
| CeO <sub>2</sub> -MnO <sub>x</sub>       | -            | -                                              | -            | -                                              | 435          | 295                                            |
| Ru/CeO <sub>2</sub> -MnO <sub>x</sub>    | 199          | 381                                            | 246          | 644                                            | 314          | 221                                            |
| Pd/CeO <sub>2</sub> -MnO <sub>x</sub>    | -            | -                                              | 275          | 821                                            | -            | -                                              |
| Ru-Pd/CeO <sub>2</sub> -MnO <sub>x</sub> | 139          | 80                                             | 209          | 1963                                           | 278          | 62                                             |

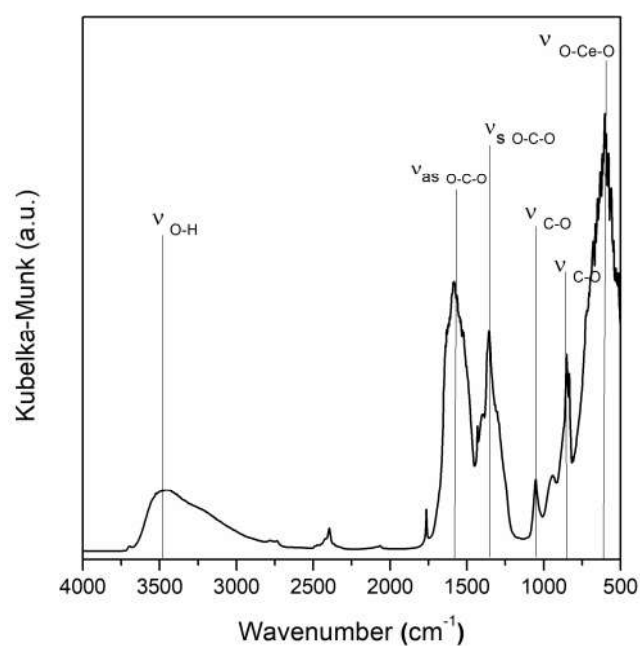Figure S2. Drift spectra of bare CeO<sub>2</sub>.

### 2.2.3. XPS Measurements

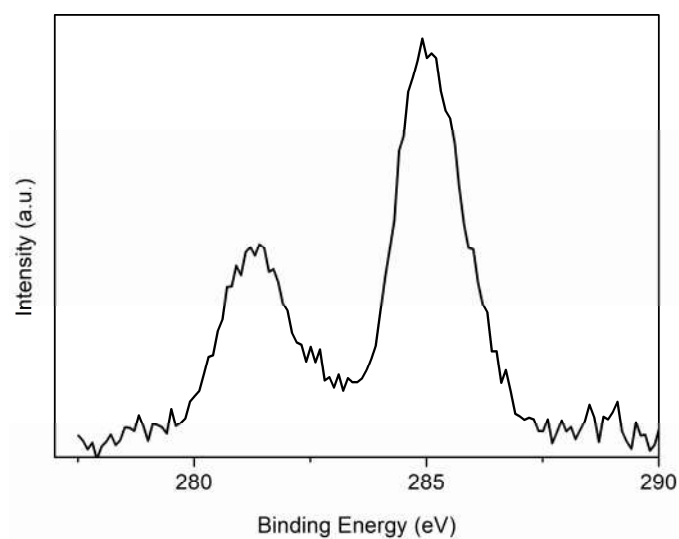

**Figure S3.** Al  $K\alpha$  excited XPS of the 1%Ru/CeO<sub>2</sub> in the Ru 3d – C 1s energy region. The peak at 281.3 eV is due to the Ru 3d<sub>5/2</sub> state, the peak at 285.0 eV is due both to the adventitious carbon and Ru 3d<sub>3/2</sub> state.

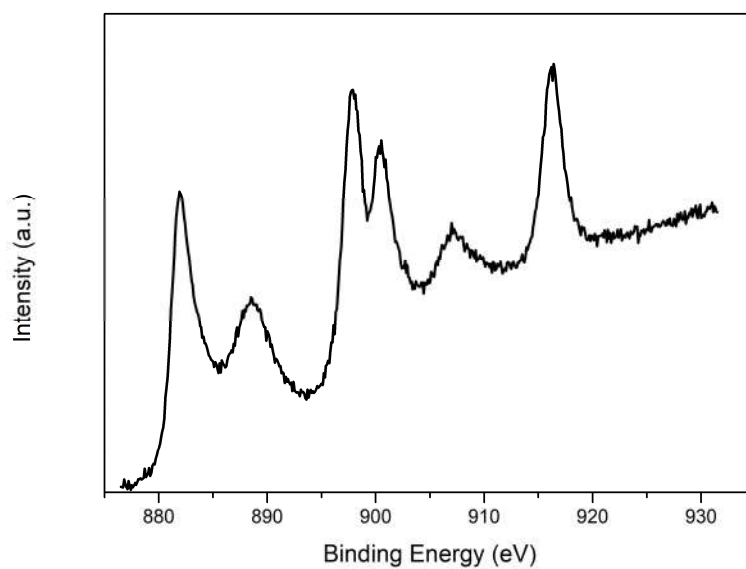

**Figure S4.** Al  $K\alpha$  excited XPS of the Ru/CeO<sub>2</sub> in the Ce 3d energy region.

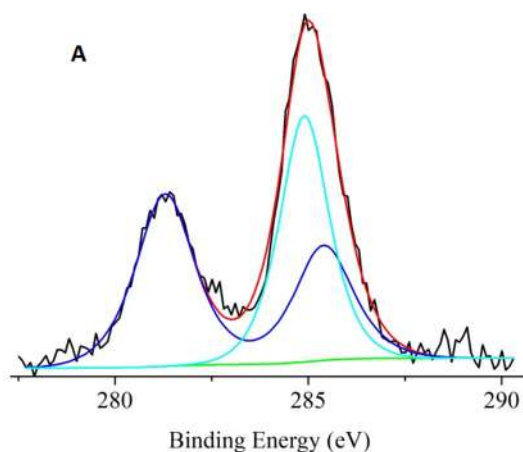

**Figure S5A.** Al K $\alpha$  excited XPS of the Ru/CeO<sub>2</sub> in the Ru 3d – C 1s energy region; the black line refers to the experimental profile; the green line refers to the background; the peaks at 281.3 and 285.4 eV (blue line) represent the Ru 3d<sub>5/2,3/2</sub> spin-orbit components, the peak at 285.0 eV (cyan line) refers to the adventitious carbon; the red line, superimposed to the experimental profile, refers to the sum of the Gaussian components.

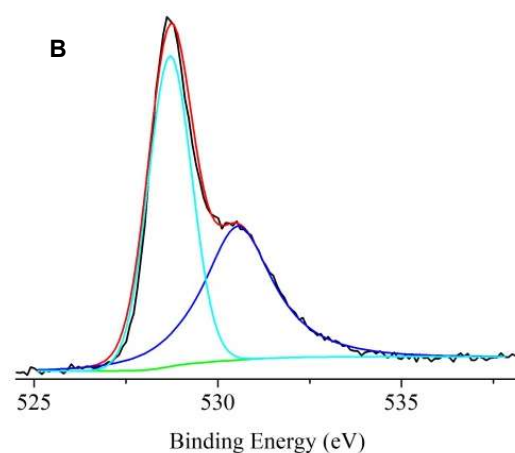

**Figure S5B.** Al K $\alpha$  excited XPS of the Ru/CeO<sub>2</sub> in the O 1s energy region. The black line refers to the experimental profile; the green line refers to the background; the cyan line refers to the 528.7 eV peak; the blue line refers to the 530.6 eV peak; the red line, superimposed to the experimental profile, refers to the sum of the Gaussian components.

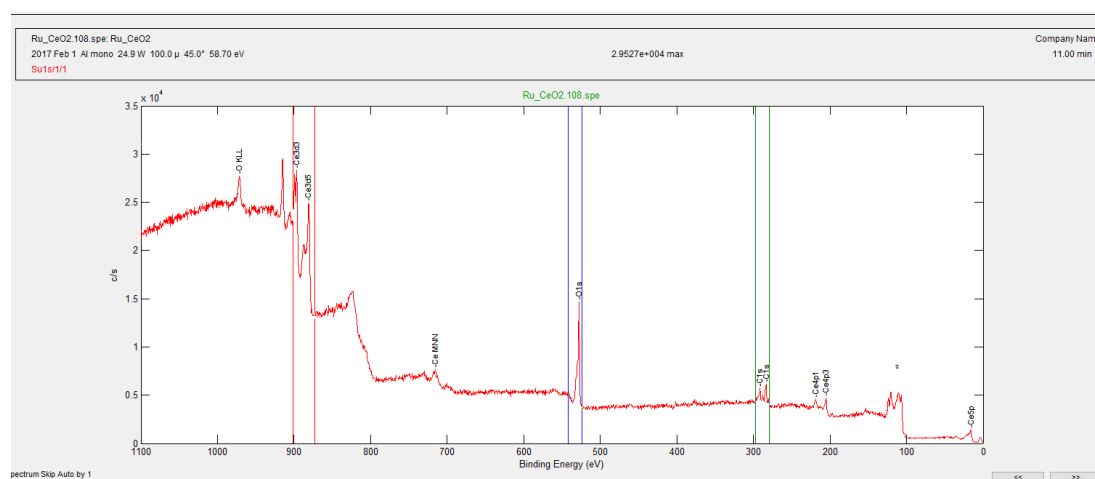

Figure S6. XPS survey spectrum of Ru/CeO<sub>2</sub>.
